# Supplementary material for: Comparative Analysis of Phytochemical Profiles and Antioxidant Activities between Sweet and Sour Wampee (Clausena lansium) Fruits
Source: MDPI journal article supplement (doi:10.3390/foods11091230), 2022-04-25
Supplement: s1 [file s1]

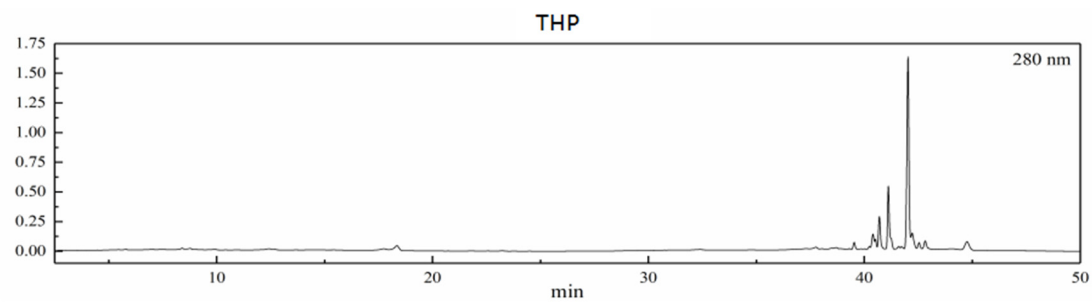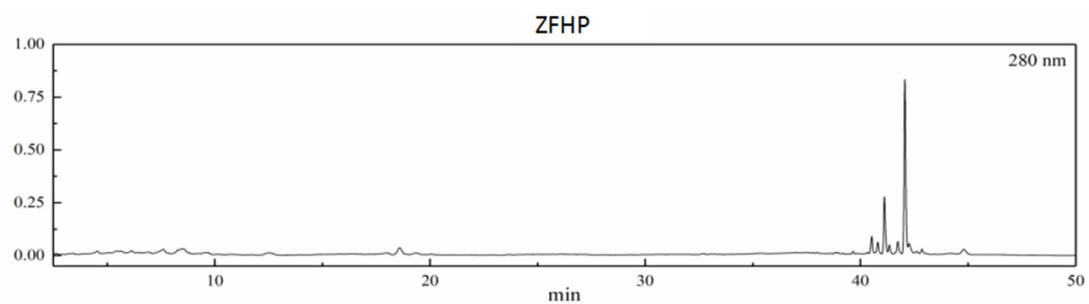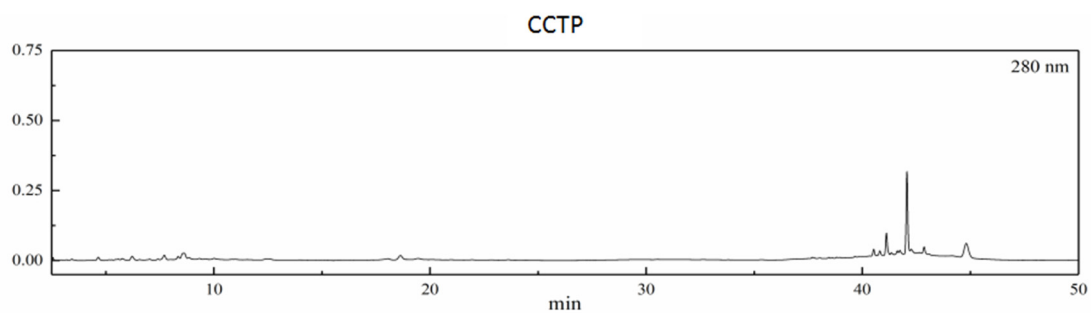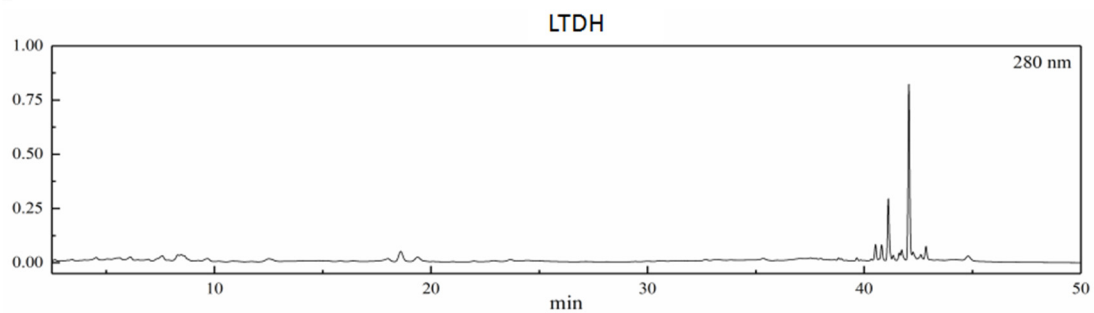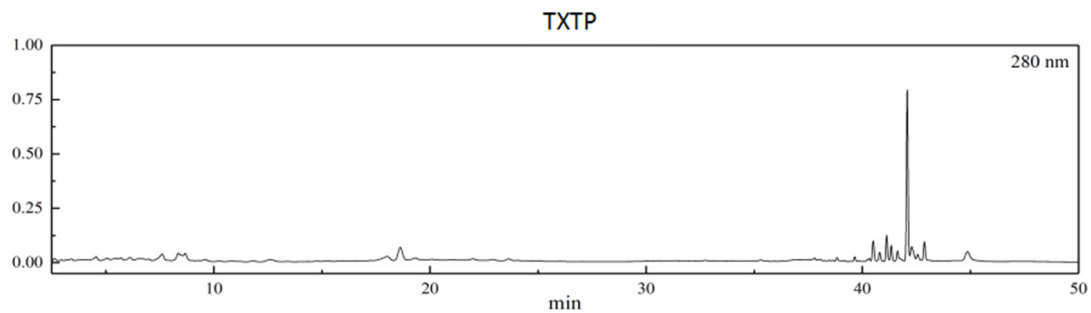

M3H

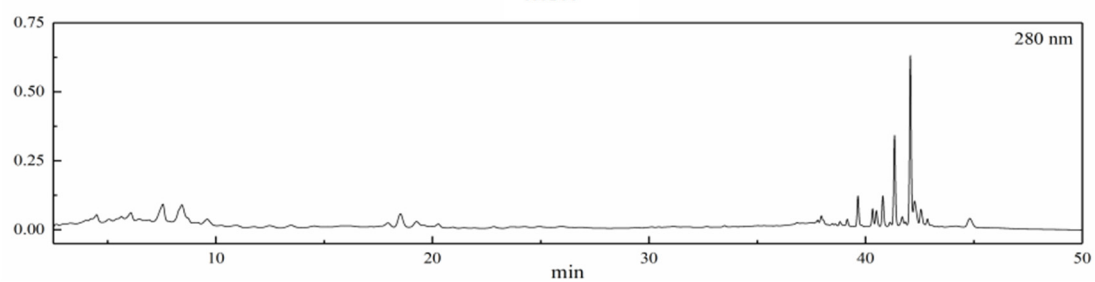

JZP

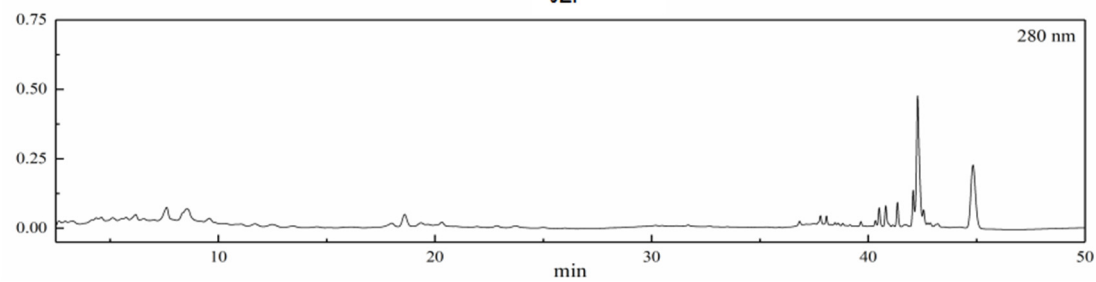

M4H

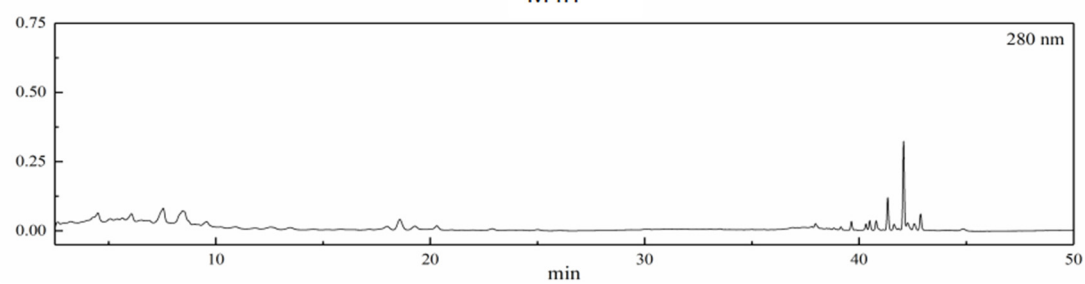

TXSP

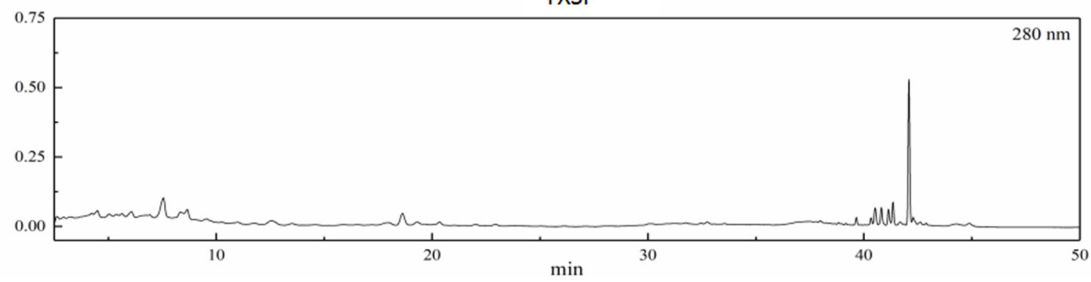

JXHP

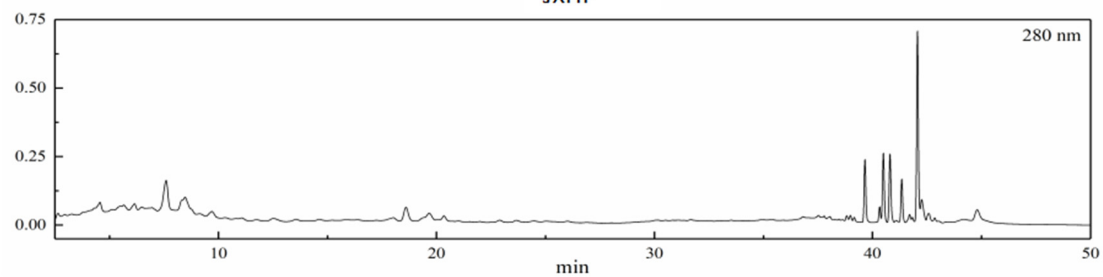

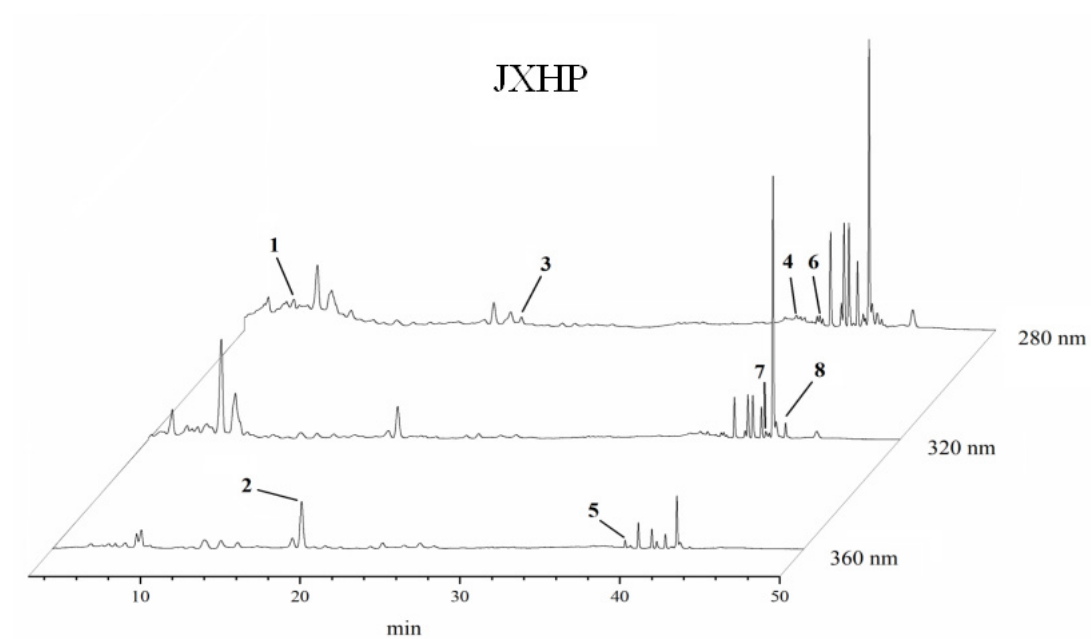

| No. | Phytochemical names    | Peak<br>time (min) | Wave<br>length (nm) |
|-----|------------------------|--------------------|---------------------|
| 1   | Syringin               | 6.480              | 280                 |
| 2   | Rutin                  | 18.515             | 360                 |
| 3   | Benoic acid            | 20.993             | 280                 |
| 4   | 2-Methoxycinnamic acid | 37.520             | 280                 |
| 5   | Kaempferol             | 38.710             | 360                 |
| 6   | Hesperetin             | 38.967             | 280                 |
| 7   | Nobiletin              | 41.604             | 320                 |
| 8   | Tangeretin             | 42.602             | 320                 |
